# Supplementary material for: Intermedin promotes breast cancer metastasis via Src/c-Myc-mediated ribosome production and protein translation
Source: Research Square preprint supplement (doi:10.21203/rs.3.rs-141035/v1), 2021-01-08
Supplement: Supplementary file 1 [file 10ab700e12ff7d7f0e0747dd.xlsx]

## Sheet: 工作表1
Category	GOID	Description	GeneRatio	BgRatio	pvalue	padj
BP	GO:0006397	mRNA processing	115/1939	452/13989	2.15e-11	1.15e-07
BP	GO:0008380	RNA splicing	102/1939	397/13989	1.66e-10	4.42e-07
BP	GO:0000375	RNA splicing, via transesterification reactions	81/1939	307/13989	3.48e-09	5.27e-06
BP	GO:0000377	RNA splicing, via transesterification reactions with bulged adenosine as nucleophile	80/1939	304/13989	4.95e-09	5.27e-06
BP	GO:0000398	mRNA splicing, via spliceosome	80/1939	304/13989	4.95e-09	5.27e-06
BP	GO:0006353	DNA-templated transcription, termination	33/1939	107/13989	4.51e-06	0.00400512
BP	GO:0050684	regulation of mRNA processing	29/1939	94/13989	1.67e-05	0.0126772
BP	GO:0000245	spliceosomal complex assembly	20/1939	55/13989	2.42e-05	0.0161089
BP	GO:0006369	termination of RNA polymerase II transcription	23/1939	69/13989	3.11e-05	0.0184259
BP	GO:0031124	mRNA 3'-end processing	27/1939	88/13989	3.59e-05	0.0191243
BP	GO:0001510	RNA methylation	21/1939	61/13989	3.96e-05	0.0191297
BP	GO:1903311	regulation of mRNA metabolic process	34/1939	123/13989	4.31e-05	0.0191297
BP	GO:0000959	mitochondrial RNA metabolic process	14/1939	34/13989	8.39e-05	0.0330806
BP	GO:0009451	RNA modification	34/1939	127/13989	8.7e-05	0.0330806
BP	GO:0043484	regulation of RNA splicing	28/1939	98/13989	0.000106068	0.0357516
BP	GO:0031123	RNA 3'-end processing	31/1939	113/13989	0.000107402	0.0357516
BP	GO:0006111	regulation of gluconeogenesis	13/1939	31/13989	0.000120124	0.0376343
BP	GO:0006406	mRNA export from nucleus	29/1939	105/13989	0.000155464	0.0435789
BP	GO:0071427	mRNA-containing ribonucleoprotein complex export from nucleus	29/1939	105/13989	0.000155464	0.0435789
BP	GO:0048024	regulation of mRNA splicing, via spliceosome	20/1939	62/13989	0.000167785	0.0446813
CC	GO:0016607	nuclear speck	82/2038	348/14808	4.42e-07	0.000281753
CC	GO:0055029	nuclear DNA-directed RNA polymerase complex	34/2038	124/14808	4.48e-05	0.0113822
CC	GO:0000428	DNA-directed RNA polymerase complex	34/2038	125/14808	5.35e-05	0.0113822
CC	GO:0030880	RNA polymerase complex	34/2038	127/14808	7.57e-05	0.0120782
